# Supplementary material for: Current and projected regional economic impacts of heatwaves in Europe
Source: PubMed Central journal article supplement (PMC8490455; doi:10.1038/s41467-021-26050-z), 2021-10-04
Supplement: 41467_2021_26050_MOESM1_ESM.pdf [file 41467_2021_26050_MOESM1_ESM.pdf]

## Supplementary Information

# Current and projected regional economic impacts of heatwaves in Europe

David García-León\*, Ana Casanueva, Gabriele Standardi, Annkatrin Burgstall, Lars Nybo, Andreas F. Flouris

\*Corresponding author: David García-León, email: [david.garcia-leon@ec.europa.eu](mailto:david.garcia-leon@ec.europa.eu). Postal address: European Commission, Joint Research Centre, Edificio Expo, Inca Garcilaso 3, 41092 Seville, Spain.

### Contents

Supplementary Figures (Supplementary Figures 1-5)

Supplementary Tables (Supplementary Tables 1-3)

Supplementary Discussion

Supplementary References

## Supplementary Figures

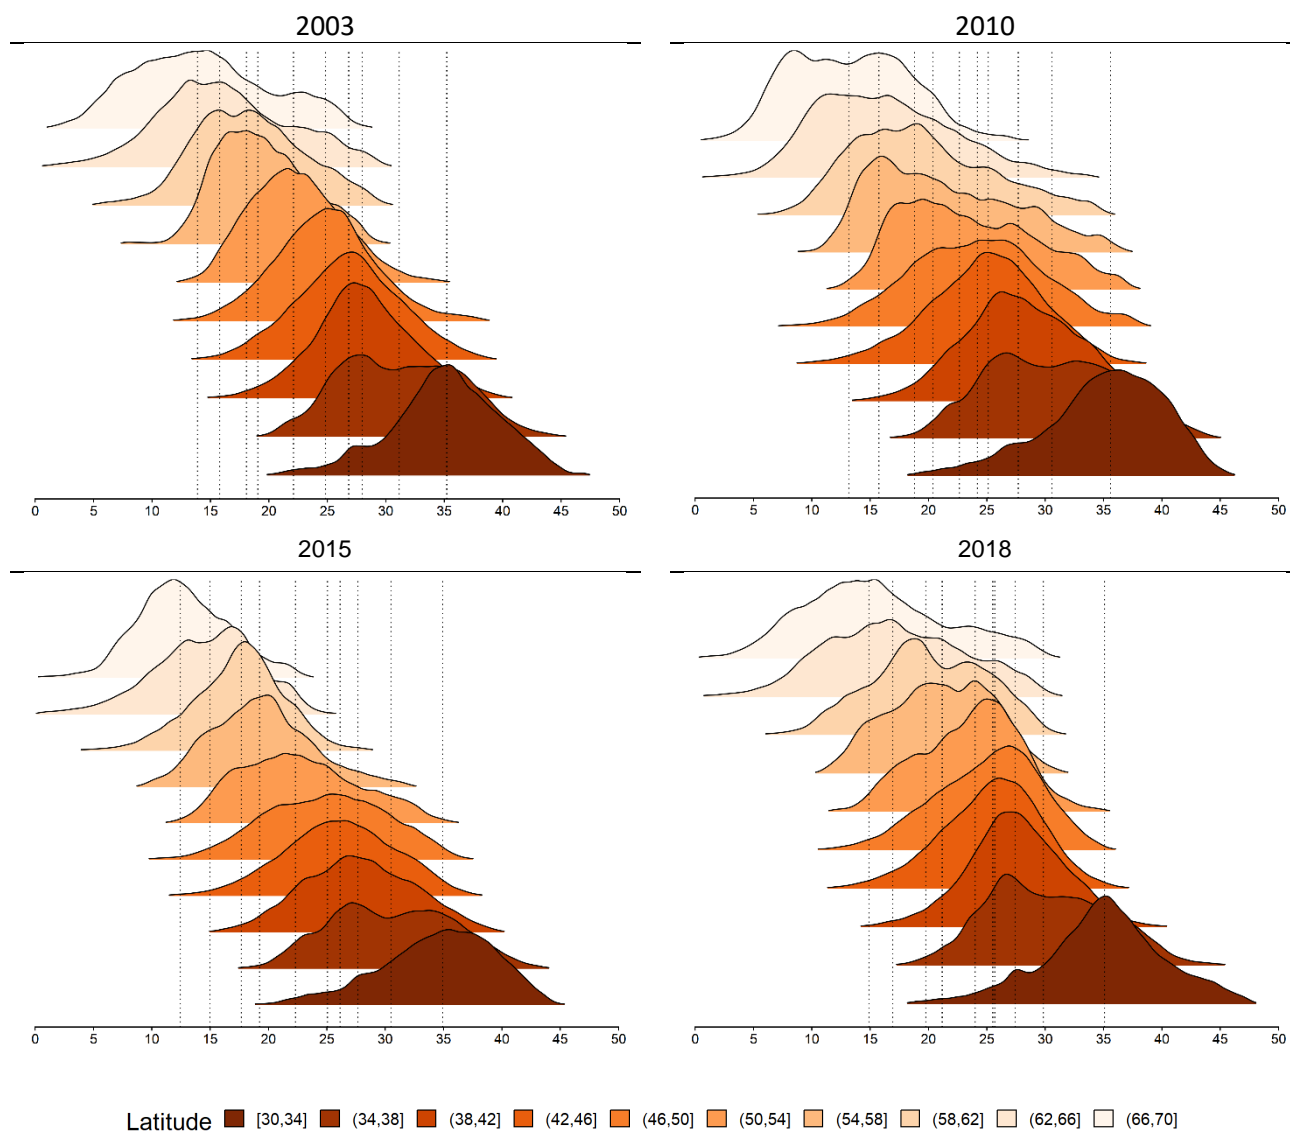

**Supplementary Figure 1. Spatial heterogeneity of extreme temperatures.** Distribution of maximum temperatures (in °C) during summer months (JJA) at different latitude ranges in the four years studied. The dotted lines represent the median maximum temperature of each distribution, reflecting the usual North-South gradient in temperatures, but capturing at the same time a certain degree of interannual spatial variability.

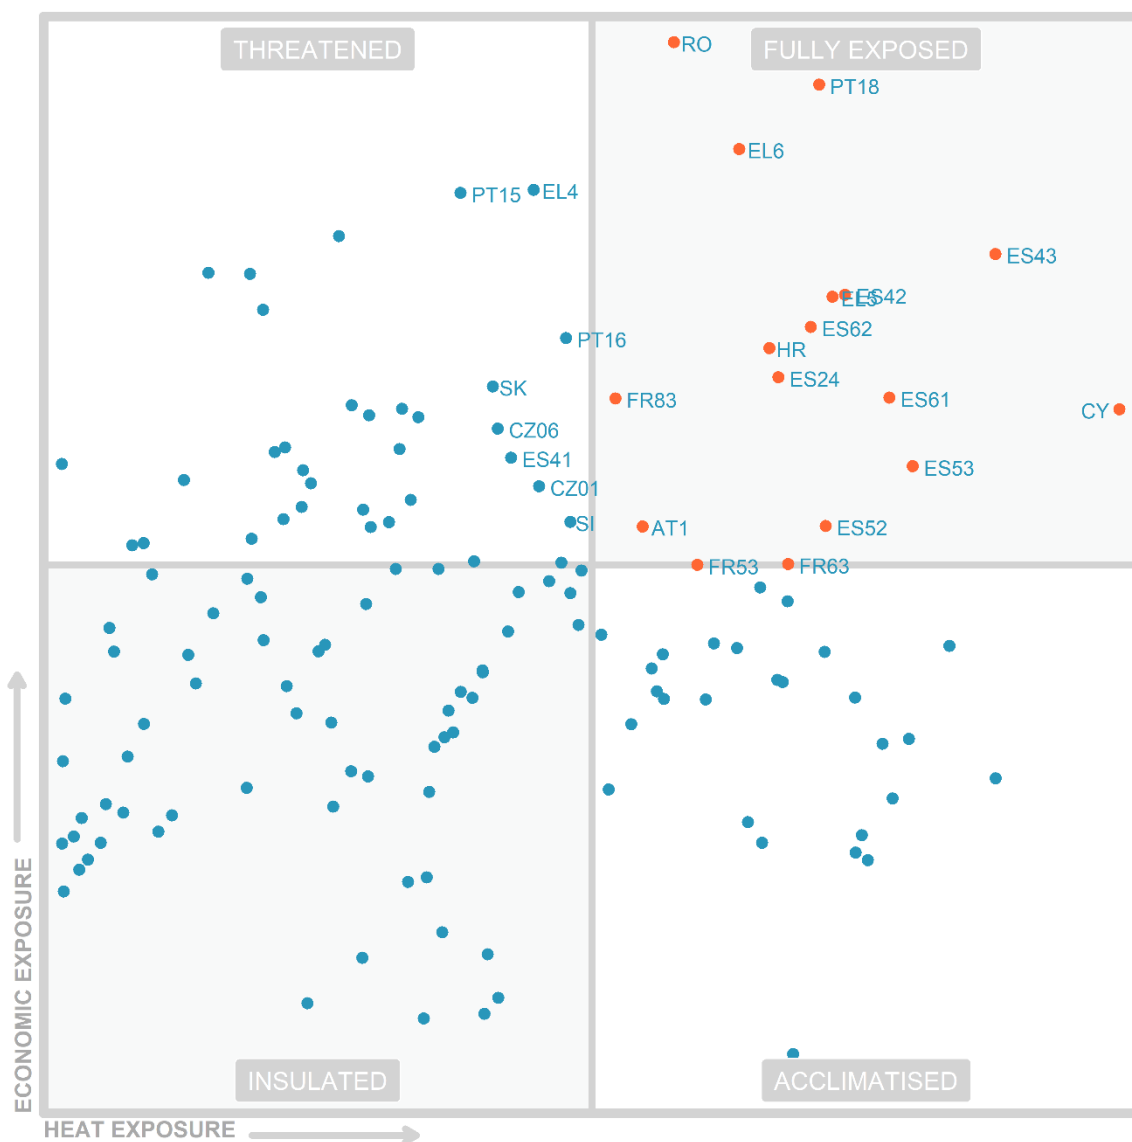

**Supplementary Figure 2. Spatial heterogeneity of extreme temperatures.** Regional vulnerability to heatwaves. Classification of regions according to their average cumulative heat exposure (average  $WBGT_{sum}$  during heatwaves in 2003, 2010, 2015, and 2018) and their economic exposure (=Share of outdoor activities out of total economic activities). Four groups of regions are identified: 'insulated', 'threatened', 'acclimatised' and 'fully exposed'. 'Fully exposed' and 'threatened' regions are subject to increasing heat stress risk due to climate change. 'Insulated' regions are not expected to suffer frequent heat stress damages in the future, as they show low environmental and economic exposure. Meanwhile, the economies of 'acclimatised' regions, despite being highly exposed to heat, are mainly based on indoor activities. We do not foresee regions lying in the lower quadrant transitioning to the upper part. In our view, left-right transitions are much more likely in the medium term due to increasingly warming temperatures. Fully exposed regions (high heat and economic exposure) are highlighted in orange. Refer to Supplementary Table 2 for regions abbreviations.

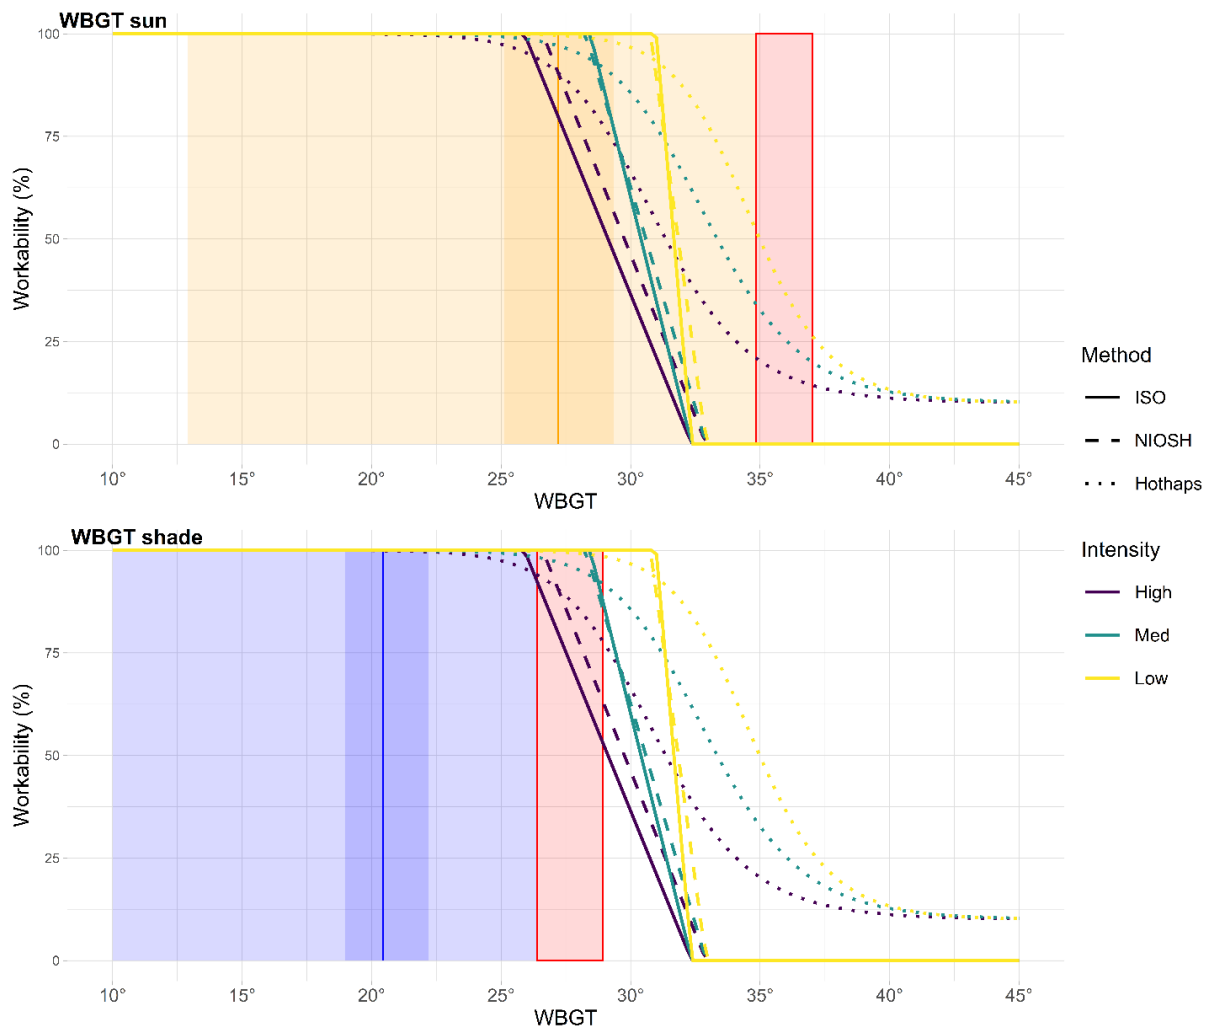

**Supplementary Figure 3. Heat-to-Workability transfer functions.** Comparison of the three approaches considered, illustrating the biophysical link between heat and labour productivity losses under different working load intensities (in Watts). The distribution of the daily average values of WBGT (sun: outdoor; shade: indoor) during identified heatwaves is also depicted. Shaded areas represent the different quartiles (0,25,50,75,100) of the respective WBGT distributions, while the vertical solid lines represent the medians. Red-shaded areas represent the right tail shift in the distributions of WBGT projected by the selected climate models (MPICSC-REMO2 and KNMI-RACMO). This picture illustrates how, under current heat conditions, indoor economic activities are hardly affected by heat-induced productivity losses for any of the heat transfer functions considered. In contrast, over the next decades indoor workers will begin to be affected by productivity losses in response to excessive heat, especially in southern regions.

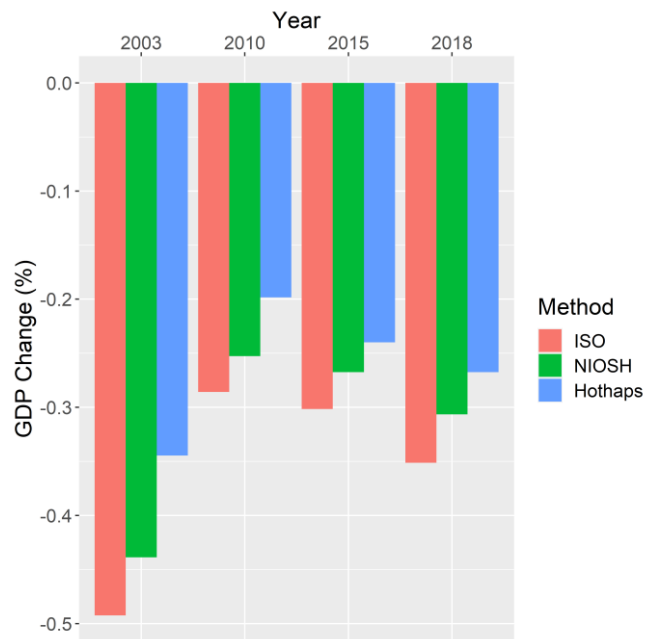

**Supplementary Figure 4. GDP losses by heat transfer functions.** Aggregated GDP impacts of heatwaves according to the three heat-to-workability functions considered. Differences within the three approaches were proportional and responded to the construction of the respective workability functions, being the Hothaps approach the most conservative out of the three considered.

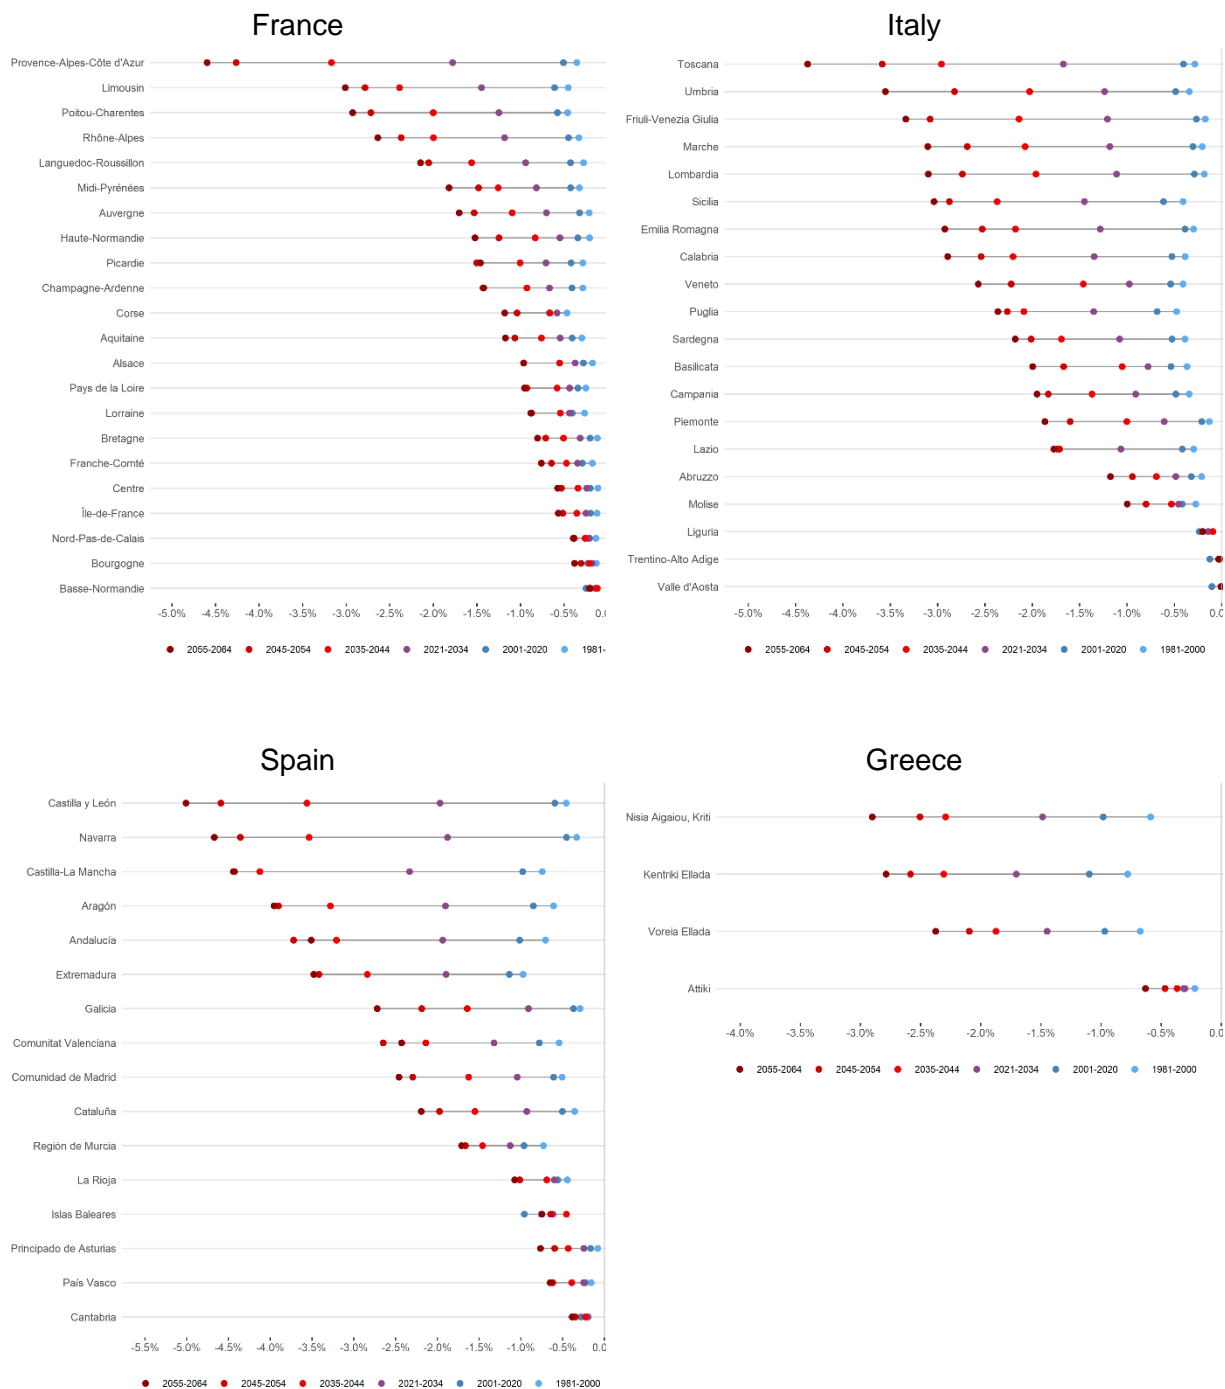

**Supplementary Figure 5. Regional-level projected impacts.** Analogously to Fig. 4, the projected evolution of heatwave-induced economic damages is shown at the regional level in four different southern European countries. The projected trend in damages is positive in all regions, with more exposed (environmentally and economically) regions being projected to experience more acute damages.

## Supplementary Tables

**Supplementary Table 1. Heatwave frequency per region and year.** Most affected regions by total number of heatwaves events identified and total cumulative duration (in days). Refer to Supplementary Table 2 for regions abbreviations.

| <b>2003</b> | Region | Events | Duration | <b>2010</b> | Region | Events | Duration |
|-------------|--------|--------|----------|-------------|--------|--------|----------|
|             | DE27   | 7      | 76       |             | EL42   | 2      | 53       |
|             | EL62   | 3      | 75       |             | LV00   | 4      | 50       |
|             | DE14   | 8      | 75       |             | FI1C   | 4      | 50       |
|             | ITI1   | 4      | 74       |             | EE00   | 4      | 50       |
|             | ITC3   | 3      | 73       |             | FI1B   | 3      | 47       |
|             | DE13   | 8      | 73       |             | EL41   | 4      | 47       |
|             | MT00   | 3      | 71       |             | FI19   | 4      | 45       |
|             | ITH1   | 6      | 70       |             | EL51   | 4      | 45       |
|             | FRF1   | 7      | 70       |             | EL65   | 4      | 44       |
|             | ITH3   | 4      | 69       |             | EL52   | 4      | 44       |
|             | ITC1   | 5      | 69       |             | ES61   | 4      | 43       |
|             | FRM0   | 4      | 69       |             | BG33   | 4      | 42       |
|             | ES53   | 5      | 69       |             | FI20   | 2      | 40       |
|             | ITI4   | 5      | 68       |             | ES43   | 5      | 40       |
|             | FRL0   | 4      | 68       |             | ES30   | 5      | 40       |
|             | ITI2   | 5      | 67       |             | EL30   | 6      | 40       |
|             | ITH4   | 3      | 67       |             | IS     | 6      | 39       |
|             | ITG2   | 5      | 67       |             | EL61   | 5      | 39       |
|             | SI04   | 7      | 66       |             | BG42   | 4      | 39       |
|             | ITC4   | 6      | 66       |             | RO32   | 3      | 38       |
|             | DE12   | 7      | 66       |             | RO31   | 3      | 38       |
|             | ITH2   | 7      | 65       |             | RO22   | 3      | 38       |
|             | DE71   | 6      | 65       |             | LT02   | 4      | 38       |
|             | DE21   | 8      | 65       |             | FI1D   | 4      | 38       |
|             | ITI3   | 7      | 64       |             | ES42   | 4      | 38       |
| <b>2015</b> | Region | Events | Duration | <b>2018</b> | Region | Events | Duration |
|             | EL62   | 2      | 68       |             | SE22   | 5      | 71       |
|             | RO21   | 7      | 57       |             | NL13   | 9      | 70       |
|             | MT00   | 3      | 55       |             | SE23   | 4      | 69       |
|             | ITF5   | 3      | 55       |             | DK03   | 8      | 69       |
|             | HR03   | 6      | 55       |             | SE21   | 6      | 68       |
|             | EL42   | 3      | 54       |             | NL21   | 7      | 66       |
|             | SK03   | 6      | 53       |             | DK04   | 7      | 66       |
|             | RO12   | 6      | 53       |             | DEA2   | 9      | 66       |
|             | RO11   | 6      | 52       |             | SE12   | 5      | 65       |
|             | ITI1   | 5      | 52       |             | PL81   | 8      | 65       |
|             | EL52   | 4      | 52       |             | FRE2   | 8      | 65       |
|             | ITH1   | 4      | 50       |             | DK01   | 6      | 65       |
|             | ITC3   | 5      | 50       |             | DEA5   | 8      | 65       |
|             | HU32   | 6      | 50       |             | DEA3   | 7      | 65       |
|             | HU31   | 6      | 50       |             | DE60   | 12     | 65       |
|             | EL51   | 3      | 50       |             | BE34   | 9      | 63       |
|             | RO42   | 6      | 49       |             | FRE1   | 7      | 62       |
|             | RO32   | 5      | 48       |             | DEA4   | 9      | 62       |
|             | ITH4   | 5      | 48       |             | DE92   | 9      | 62       |
|             | ITF6   | 3      | 48       |             | SE31   | 6      | 61       |
|             | ITF2   | 5      | 48       |             | DK02   | 5      | 61       |
|             | ES61   | 3      | 48       |             | DE93   | 10     | 61       |
|             | EL61   | 5      | 48       |             | BE32   | 7      | 61       |
|             | EL41   | 4      | 48       |             | LU00   | 7      | 60       |
|             | RO22   | 5      | 47       |             | DEF0   | 8      | 60       |

**Supplementary Table 2. Regions analysed and correspondence with the regional resolution of the economic model.** 274 regions were analysed\*. Heatwave characterisation (events, duration, severity) and labour productivity losses were calculated at the regional level. Productivity losses were spatially aggregated (weighted by population) according to the shown spatial resolution of the regions considered in the economic model. \*Canary Islands (NUTS2: ES70) were excluded, as they are outside the climate models' domain. The autonomous cities of Ceuta (ES63) and Melilla (ES64) were grouped within the region of Andalusia (ES61).

| NO. REGION | COUNTRY CODE | NUTS CODE | NUTS NAME                                                   | NUTS LEVEL IN CGE MODEL | CGE CODE |
|------------|--------------|-----------|-------------------------------------------------------------|-------------------------|----------|
| 1          | AT           | AT11      | Burgenland                                                  | 1                       | AT1      |
| 2          | AT           | AT12      | Niederösterreich                                            | 1                       | AT1      |
| 3          | AT           | AT13      | Wien                                                        | 1                       | AT1      |
| 4          | AT           | AT21      | Kärnten                                                     | 1                       | AT2      |
| 5          | AT           | AT22      | Steiermark                                                  | 1                       | AT2      |
| 6          | AT           | AT31      | Oberösterreich                                              | 1                       | AT3      |
| 7          | AT           | AT32      | Salzburg                                                    | 1                       | AT3      |
| 8          | AT           | AT33      | Tirol                                                       | 1                       | AT3      |
| 9          | AT           | AT34      | Vorarlberg                                                  | 1                       | AT3      |
| 10         | BE           | BE23      | Prov. Oost-Vlaanderen                                       | 1                       | BE2      |
| 11         | BE           | BE24      | Prov. Vlaams-Brabant                                        | 1                       | BE2      |
| 12         | BE           | BE25      | Prov. West-Vlaanderen                                       | 1                       | BE2      |
| 13         | BE           | BE31      | Prov. Brabant Wallon                                        | 1                       | BE3      |
| 14         | BE           | BE32      | Prov. Hainaut                                               | 1                       | BE3      |
| 15         | BE           | BE33      | Prov. Liège                                                 | 1                       | BE3      |
| 16         | BE           | BE34      | Prov. Luxembourg (BE)                                       | 1                       | BE3      |
| 17         | BE           | BE35      | Prov. Namur                                                 | 1                       | BE3      |
| 18         | BE           | BE10      | Région de Bruxelles-Capitale/Brussels Hoofdstedelijk Gewest | 1                       | BE1      |
| 19         | BE           | BE21      | Prov. Antwerpen                                             | 1                       | BE2      |
| 20         | BE           | BE22      | Prov. Limburg (BE)                                          | 1                       | BE2      |
| 21         | BG           | BG31      | Северозападен                                               | 0                       | BG       |
| 22         | BG           | BG32      | Северен централен                                           | 0                       | BG       |
| 23         | BG           | BG33      | Североизточен                                               | 0                       | BG       |
| 24         | BG           | BG34      | Югоизточен                                                  | 0                       | BG       |
| 25         | BG           | BG41      | Югозападен                                                  | 0                       | BG       |
| 26         | BG           | BG42      | Южен централен                                              | 0                       | BG       |
| 27         | CH           | CH        | Confédération suisse                                        | 0                       | CH       |
| 28         | CY           | CY00      | ΚΥΠΡΟΣ                                                      | 0                       | CY       |
| 29         | CZ           | CZ07      | Střední Morava                                              | 2                       | CZ07     |
| 30         | CZ           | CZ08      | Moravskoslezsko                                             | 2                       | CZ08     |
| 31         | CZ           | CZ01      | Praha                                                       | 2                       | CZ01     |
| 32         | CZ           | CZ02      | Střední Čechy                                               | 2                       | CZ02     |
| 33         | CZ           | CZ03      | Jihozápad                                                   | 2                       | CZ03     |
| 34         | CZ           | CZ04      | Severozápad                                                 | 2                       | CZ04     |
| 35         | CZ           | CZ05      | Severovýchod                                                | 2                       | CZ05     |
| 36         | CZ           | CZ06      | Jihovýchod                                                  | 2                       | CZ06     |
| 37         | DE           | DE50      | Bremen                                                      | 1                       | DE5      |
| 38         | DE           | DE60      | Hamburg                                                     | 1                       | DE6      |



|    |    |      |                        |   |     |
|----|----|------|------------------------|---|-----|
| 39 | DE | DE71 | Darmstadt              | 1 | DE7 |
| 40 | DE | DE72 | Gießen                 | 1 | DE7 |
| 41 | DE | DE73 | Kassel                 | 1 | DE7 |
| 42 | DE | DE80 | Mecklenburg-Vorpommern | 1 | DE8 |
| 43 | DE | DE91 | Braunschweig           | 1 | DE9 |
| 44 | DE | DE92 | Hannover               | 1 | DE9 |
| 45 | DE | DE93 | Lüneburg               | 1 | DE9 |
| 46 | DE | DE94 | Weser-Ems              | 1 | DE9 |
| 47 | DE | DE11 | Stuttgart              | 1 | DE1 |
| 48 | DE | DE12 | Karlsruhe              | 1 | DE1 |
| 49 | DE | DE13 | Freiburg               | 1 | DE1 |
| 50 | DE | DE14 | Tübingen               | 1 | DE1 |
| 51 | DE | DE21 | Oberbayern             | 1 | DE2 |
| 52 | DE | DE22 | Niederbayern           | 1 | DE2 |
| 53 | DE | DE23 | Oberpfalz              | 1 | DE2 |
| 54 | DE | DE24 | Oberfranken            | 1 | DE2 |
| 55 | DE | DE25 | Mittelfranken          | 1 | DE2 |
| 56 | DE | DE26 | Unterfranken           | 1 | DE2 |
| 57 | DE | DE27 | Schwaben               | 1 | DE2 |
| 58 | DE | DE30 | Berlin                 | 1 | DE3 |
| 59 | DE | DE40 | Brandenburg            | 1 | DE4 |
| 60 | DE | DEA1 | Düsseldorf             | 1 | DEA |
| 61 | DE | DEA2 | Köln                   | 1 | DEA |
| 62 | DE | DEA3 | Münster                | 1 | DEA |
| 63 | DE | DEA4 | Detmold                | 1 | DEA |
| 64 | DE | DEA5 | Arnsberg               | 1 | DEA |
| 65 | DE | DEB1 | Koblenz                | 1 | DEB |
| 66 | DE | DEB2 | Trier                  | 1 | DEB |
| 67 | DE | DEB3 | Rheinessen-Pfalz       | 1 | DEB |
| 68 | DE | DEC0 | Saarland               | 1 | DEC |
| 69 | DE | DED2 | Dresden                | 1 | DED |
| 70 | DE | DED4 | Chemnitz               | 1 | DED |
| 71 | DE | DED5 | Leipzig                | 1 | DED |
| 72 | DE | DEE0 | Sachsen-Anhalt         | 1 | DEE |
| 73 | DE | DEF0 | Schleswig-Holstein     | 1 | DEF |
| 74 | DE | DEG0 | Thüringen              | 1 | DEG |
| 75 | DK | DK01 | Hovedstaden            | 0 | DK  |
| 76 | DK | DK02 | Sjælland               | 0 | DK  |
| 77 | DK | DK03 | Syddanmark             | 0 | DK  |
| 78 | DK | DK04 | Midtjylland            | 0 | DK  |
| 79 | DK | DK05 | Nordjylland            | 0 | DK  |
| 80 | EE | EE00 | Eesti                  | 0 | EE  |
| 81 | EL | EL53 | Δυτική Μακεδονία       | 1 | EL1 |
| 82 | EL | EL54 | Ήπειρος                | 1 | EL2 |
| 83 | EL | EL61 | Θεσσαλία               | 1 | EL1 |
| 84 | EL | EL62 | Ιόνια Νησιά            | 1 | EL2 |
| 85 | EL | EL63 | Δυτική Ελλάδα          | 1 | EL2 |

|     |    |      |                            |   |                                |
|-----|----|------|----------------------------|---|--------------------------------|
| 86  | EL | EL64 | Στερεά Ελλάδα              | 1 | EL2                            |
| 87  | EL | EL65 | Πελοπόννησος               | 1 | EL2                            |
| 88  | EL | EL30 | Αττική                     | 1 | EL3                            |
| 89  | EL | EL41 | Βόρειο Αιγαίο              | 1 | EL4                            |
| 90  | EL | EL42 | Νότιο Αιγαίο               | 1 | EL4                            |
| 91  | EL | EL43 | Κρήτη                      | 1 | EL4                            |
| 92  | EL | EL51 | Ανατολική Μακεδονία, Θράκη | 1 | EL1                            |
| 93  | EL | EL52 | Κεντρική Μακεδονία         | 1 | EL1                            |
| 94  | ES | ES43 | Extremadura                | 2 | ES43                           |
| 95  | ES | ES51 | Cataluña                   | 2 | ES51                           |
| 96  | ES | ES52 | Comunidad Valenciana       | 2 | ES52                           |
| 97  | ES | ES53 | Illes Balears              | 2 | ES53<br>ES61-<br>ES63-<br>ES64 |
| 98  | ES | ES61 | Andalucía                  | 2 | ES62<br>ES61-<br>ES63-<br>ES64 |
| 99  | ES | ES62 | Región de Murcia           | 2 | ES62<br>ES61-<br>ES63-<br>ES64 |
|     | ES | ES63 | Ciudad Autónoma de Ceuta   | 2 | ES61-<br>ES63-<br>ES64         |
|     | ES | ES64 | Ciudad Autónoma de Melilla | 2 | ES61-<br>ES63-<br>ES64         |
|     | ES | ES70 | Canarias                   | 2 | ES70                           |
| 100 | ES | ES11 | Galicia                    | 2 | ES11                           |
| 101 | ES | ES12 | Principado de Asturias     | 2 | ES12                           |
| 102 | ES | ES13 | Cantabria                  | 2 | ES13                           |
| 103 | ES | ES21 | País Vasco                 | 2 | ES21                           |
| 104 | ES | ES22 | Comunidad Foral de Navarra | 2 | ES22                           |
| 105 | ES | ES23 | La Rioja                   | 2 | ES23                           |
| 106 | ES | ES24 | Aragón                     | 2 | ES24                           |
| 107 | ES | ES30 | Comunidad de Madrid        | 2 | ES30                           |
| 108 | ES | ES41 | Castilla y León            | 2 | ES41                           |
| 109 | ES | ES42 | Castilla-La Mancha         | 2 | ES42                           |
| 110 | FI | FI19 | Länsi-Suomi                | 0 | FI                             |
| 111 | FI | FI1B | Helsinki-Uusimaa           | 0 | FI                             |
| 112 | FI | FI1C | Etelä-Suomi                | 0 | FI                             |
| 113 | FI | FI1D | Pohjois- ja Itä-Suomi      | 0 | FI                             |
| 114 | FI | FI20 | Åland                      | 0 | FI                             |
| 115 | FR | FR13 | Poitou-Charentes           | 2 | FR53                           |
| 116 | FR | FRJ1 | Languedoc-Roussillon       | 2 | FR81                           |
| 117 | FR | FRJ2 | Midi-Pyrénées              | 2 | FR62                           |
| 118 | FR | FRK1 | Auvergne                   | 2 | FR72                           |
| 119 | FR | FRK2 | Rhône-Alpes                | 2 | FR71                           |
| 120 | FR | FRL0 | Provence-Alpes-Côte d'Azur | 2 | FR82                           |
| 121 | FR | FRM0 | Corse                      | 2 | FR83                           |
| 122 | FR | FR10 | Ile-de-France              | 2 | FR10                           |
| 123 | FR | FRB0 | Centre - Val de Loire      | 2 | FR24                           |
| 124 | FR | FRC1 | Bourgogne                  | 2 | FR26                           |
| 125 | FR | FRC2 | Franche-Comté              | 2 | FR43                           |
| 126 | FR | FRD1 | Basse-Normandie            | 2 | FR25                           |
| 127 | FR | FRD2 | Haute-Normandie            | 2 | FR23                           |

|     |    |      |                                     |   |               |
|-----|----|------|-------------------------------------|---|---------------|
| 128 | FR | FRE1 | Nord-Pas de Calais                  | 2 | FR30          |
| 129 | FR | FRE2 | Picardie                            | 2 | FR22          |
| 130 | FR | FRF1 | Alsace                              | 2 | FR42          |
| 131 | FR | FRF2 | Champagne-Ardenne                   | 2 | FR21          |
| 132 | FR | FRF3 | Lorraine                            | 2 | FR41          |
| 133 | FR | FRG0 | Pays de la Loire                    | 2 | FR51          |
| 134 | FR | FRH0 | Bretagne                            | 2 | FR52          |
| 135 | FR | FRI1 | Aquitaine                           | 2 | FR61          |
| 136 | FR | FRI2 | Limousin                            | 2 | FR63          |
| 137 | HR | HR03 | Jadranska Hrvatska                  | 0 | HR            |
| 138 | HR | HR04 | Kontinentalna Hrvatska              | 0 | HR            |
| 139 | HU | HU23 | Dél-Dunántúl                        | 0 | HU            |
| 140 | HU | HU31 | Észak-Magyarország                  | 0 | HU            |
| 141 | HU | HU32 | Észak-Alföld                        | 0 | HU            |
| 142 | HU | HU33 | Dél-Alföld                          | 0 | HU            |
| 143 | HU | HU11 | Budapest                            | 0 | HU            |
| 144 | HU | HU12 | Pest                                | 0 | HU            |
| 145 | HU | HU21 | Közép-Dunántúl                      | 0 | HU            |
| 146 | HU | HU22 | Nyugat-Dunántúl                     | 0 | HU            |
| 147 | IE | IE04 | Northern and Western                | 0 | IE            |
| 148 | IE | IE05 | Southern                            | 0 | IE            |
| 149 | IE | IE06 | Eastern and Midland                 | 0 | IE            |
| 150 | IS | IS   | Ísland                              | 0 | IS            |
| 151 | IT | ITC1 | Piemonte                            | 2 | ITC1          |
| 152 | IT | ITC2 | Valle d'Aosta/Vallée d'Aoste        | 2 | ITC2          |
| 153 | IT | ITC3 | Liguria                             | 2 | ITC3          |
| 154 | IT | ITG2 | Sardegna                            | 2 | ITG2          |
| 155 | IT | ITH1 | Provincia Autonoma di Bolzano/Bozen | 2 | ITH1-<br>ITH2 |
| 156 | IT | ITH2 | Provincia Autonoma di Trento        | 2 | ITH1-<br>ITH2 |
| 157 | IT | ITH3 | Veneto                              | 2 | ITH3          |
| 158 | IT | ITH4 | Friuli-Venezia Giulia               | 2 | ITH4          |
| 159 | IT | ITH5 | Emilia-Romagna                      | 2 | ITH5          |
| 160 | IT | ITI1 | Toscana                             | 2 | ITI1          |
| 161 | IT | ITI2 | Umbria                              | 2 | ITI2          |
| 162 | IT | ITI3 | Marche                              | 2 | ITI3          |
| 163 | IT | ITI4 | Lazio                               | 2 | ITI4          |
| 164 | IT | ITC4 | Lombardia                           | 2 | ITC4          |
| 165 | IT | ITF1 | Abruzzo                             | 2 | ITF1          |
| 166 | IT | ITF2 | Molise                              | 2 | ITF2          |
| 167 | IT | ITF3 | Campania                            | 2 | ITF3          |
| 168 | IT | ITF4 | Puglia                              | 2 | ITF4          |
| 169 | IT | ITF5 | Basilicata                          | 2 | ITF5          |
| 170 | IT | ITF6 | Calabria                            | 2 | ITF6          |
| 171 | IT | ITG1 | Sicilia                             | 2 | ITG1          |
| 172 | LT | LT01 | Sostinės regionas                   | 0 | LT            |
| 173 | LT | LT02 | Vidurio ir vakarų Lietuvos regionas | 0 | LT            |

|     |    |      |                              |   |      |
|-----|----|------|------------------------------|---|------|
| 174 | LU | LU00 | Luxembourg                   | 0 | LU   |
| 175 | LV | LV00 | Latvija                      | 0 | LV   |
| 176 | MT | MT00 | Malta                        | 0 | MT   |
| 177 | NL | NL11 | Groningen                    | 1 | NL1  |
| 178 | NL | NL12 | Friesland (NL)               | 1 | NL1  |
| 179 | NL | NL13 | Drenthe                      | 1 | NL1  |
| 180 | NL | NL21 | Overijssel                   | 1 | NL2  |
| 181 | NL | NL22 | Gelderland                   | 1 | NL2  |
| 182 | NL | NL23 | Flevoland                    | 1 | NL2  |
| 183 | NL | NL31 | Utrecht                      | 1 | NL3  |
| 184 | NL | NL32 | Noord-Holland                | 1 | NL3  |
| 185 | NL | NL33 | Zuid-Holland                 | 1 | NL3  |
| 186 | NL | NL34 | Zeeland                      | 1 | NL3  |
| 187 | NL | NL41 | Noord-Brabant                | 1 | NL4  |
| 188 | NL | NL42 | Limburg (NL)                 | 1 | NL4  |
| 189 | NO | NO   | Norge                        | 0 | NO   |
| 190 | PL | PL22 | Śląskie                      | 1 | PL2  |
| 191 | PL | PL41 | Wielkopolskie                | 1 | PL4  |
| 192 | PL | PL42 | Zachodniopomorskie           | 1 | PL4  |
| 193 | PL | PL43 | Lubuskie                     | 1 | PL4  |
| 194 | PL | PL51 | Dolnośląskie                 | 1 | PL5  |
| 195 | PL | PL52 | Opolskie                     | 1 | PL5  |
| 196 | PL | PL61 | Kujawsko-pomorskie           | 1 | PL6  |
| 197 | PL | PL62 | Warmińsko-mazurskie          | 1 | PL6  |
| 198 | PL | PL63 | Pomorskie                    | 1 | PL6  |
| 199 | PL | PL71 | Łódzkie                      | 1 | PL1  |
| 200 | PL | PL72 | Świętokrzyskie               | 1 | PL3  |
| 201 | PL | PL81 | Lubelskie                    | 1 | PL3  |
| 202 | PL | PL82 | Podkarpackie                 | 1 | PL3  |
| 203 | PL | PL84 | Podlaskie                    | 1 | PL3  |
| 204 | PL | PL91 | Warszawski stołeczny         | 1 | PL1  |
| 205 | PL | PL92 | Mazowiecki regionalny        | 1 | PL1  |
| 206 | PL | PL21 | Małopolskie                  | 1 | PL2  |
| 207 | PT | PT16 | Centro (PT)                  | 2 | PT16 |
| 208 | PT | PT17 | Área Metropolitana de Lisboa | 2 | PT17 |
| 209 | PT | PT18 | Alentejo                     | 2 | PT18 |
| 210 | PT | PT11 | Norte                        | 2 | PT11 |
| 211 | PT | PT15 | Algarve                      | 2 | PT15 |
| 212 | RO | RO11 | Nord-Vest                    | 0 | RO   |
| 213 | RO | RO12 | Centru                       | 0 | RO   |
| 214 | RO | RO21 | Nord-Est                     | 0 | RO   |
| 215 | RO | RO22 | Sud-Est                      | 0 | RO   |
| 216 | RO | RO31 | Sud - Muntenia               | 0 | RO   |
| 217 | RO | RO32 | București-Ilfov              | 0 | RO   |
| 218 | RO | RO41 | Sud-Vest Oltenia             | 0 | RO   |
| 219 | RO | RO42 | Vest                         | 0 | RO   |
| 220 | SE | SE11 | Stockholm                    | 1 | SE1  |

|     |    |      |                                                  |   |     |
|-----|----|------|--------------------------------------------------|---|-----|
| 221 | SE | SE12 | Östra Mellansverige                              | 1 | SE1 |
| 222 | SE | SE21 | Småland med öarna                                | 1 | SE2 |
| 223 | SE | SE22 | Sydsverige                                       | 1 | SE2 |
| 224 | SE | SE23 | Västsverige                                      | 1 | SE2 |
| 225 | SE | SE31 | Norra Mellansverige                              | 1 | SE3 |
| 226 | SE | SE32 | Mellersta Norrland                               | 1 | SE3 |
| 227 | SE | SE33 | Övre Norrland                                    | 1 | SE3 |
| 228 | SI | SI03 | Vzhodna Slovenija                                | 0 | SI  |
| 229 | SI | SI04 | Zahodna Slovenija                                | 0 | SI  |
| 230 | SK | SK01 | Bratislavský kraj                                | 0 | SK  |
| 231 | SK | SK02 | Západné Slovensko                                | 0 | SK  |
| 232 | SK | SK03 | Stredné Slovensko                                | 0 | SK  |
| 233 | SK | SK04 | Východné Slovensko                               | 0 | SK  |
| 234 | UK | UKC1 | Tees Valley and Durham                           | 1 | UKC |
| 235 | UK | UKC2 | Northumberland and Tyne and Wear                 | 1 | UKC |
| 236 | UK | UKD1 | Cumbria                                          | 1 | UKD |
| 237 | UK | UKD3 | Greater Manchester                               | 1 | UKD |
| 238 | UK | UKD4 | Lancashire                                       | 1 | UKD |
| 239 | UK | UKD6 | Cheshire                                         | 1 | UKD |
| 240 | UK | UKD7 | Merseyside                                       | 1 | UKD |
| 241 | UK | UKE1 | East Yorkshire and Northern Lincolnshire         | 1 | UKE |
| 242 | UK | UKE2 | North Yorkshire                                  | 1 | UKE |
| 243 | UK | UKE3 | South Yorkshire                                  | 1 | UKE |
| 244 | UK | UKM6 | Highlands and Islands                            | 1 | UKM |
| 245 | UK | UKK1 | Gloucestershire, Wiltshire and Bristol/Bath area | 1 | UKK |
| 246 | UK | UKK2 | Dorset and Somerset                              | 1 | UKK |
| 247 | UK | UKK3 | Cornwall and Isles of Scilly                     | 1 | UKK |
| 248 | UK | UKK4 | Devon                                            | 1 | UKK |
| 249 | UK | UKL1 | West Wales and The Valleys                       | 1 | UKL |
| 250 | UK | UKL2 | East Wales                                       | 1 | UKL |
| 251 | UK | UKM5 | North Eastern Scotland                           | 1 | UKM |
| 252 | UK | UKM7 | Eastern Scotland                                 | 1 | UKM |
| 253 | UK | UKM8 | West Central Scotland                            | 1 | UKM |
| 254 | UK | UKM9 | Southern Scotland                                | 1 | UKM |
| 255 | UK | UKN0 | Northern Ireland                                 | 1 | UKN |
| 256 | UK | UKE4 | West Yorkshire                                   | 1 | UKE |
| 257 | UK | UKF1 | Derbyshire and Nottinghamshire                   | 1 | UKF |
| 258 | UK | UKF2 | Leicestershire, Rutland and Northamptonshire     | 1 | UKF |
| 259 | UK | UKF3 | Lincolnshire                                     | 1 | UKF |
| 260 | UK | UKG1 | Herefordshire, Worcestershire and Warwickshire   | 1 | UKG |
| 261 | UK | UKG2 | Shropshire and Staffordshire                     | 1 | UKG |
| 262 | UK | UKG3 | West Midlands                                    | 1 | UKG |
| 263 | UK | UKH1 | East Anglia                                      | 1 | UKH |
| 264 | UK | UKH2 | Bedfordshire and Hertfordshire                   | 1 | UKH |
| 265 | UK | UKH3 | Essex                                            | 1 | UKH |
| 266 | UK | UKI3 | Inner London - West                              | 1 | UKI |
| 267 | UK | UKI4 | Inner London - East                              | 1 | UKI |

|     |    |      |                                            |   |     |
|-----|----|------|--------------------------------------------|---|-----|
| 268 | UK | UKI5 | Outer London - East and North East         | 1 | UKI |
| 269 | UK | UKI6 | Outer London - South                       | 1 | UKI |
| 270 | UK | UKI7 | Outer London - West and North West         | 1 | UKI |
| 271 | UK | UKJ1 | Berkshire, Buckinghamshire and Oxfordshire | 1 | UKJ |
| 272 | UK | UKJ2 | Surrey, East and West Sussex               | 1 | UKJ |
| 273 | UK | UKJ3 | Hampshire and Isle of Wight                | 1 | UKJ |
| 274 | UK | UKJ4 | Kent                                       | 1 | UKJ |

**Supplementary Table 3. Classification of economic sectors.** Five macro-sectors were distinguished attending to their heat exposure levels and working load intensity in Watts (W).

| Economic Sector | Abbreviation | Heat Exposure | Metabolic Intensity (W) |
|-----------------|--------------|---------------|-------------------------|
| Agriculture     | AGR          | Outdoor       | High                    |
| Industry        | IND          | Indoor        | Medium                  |
| Construction    | CONST        | Outdoor       | High                    |
| Transportation  | TRANS        | Outdoor       | Medium                  |
| Services        | SERV         | Indoor        | Low                     |

## Supplementary Discussion

The physical impacts of climate change considered in our study (based on the RCP8.5 scenario) are only compatible with the socioeconomic scenario SSP5 (as illustrated by Fig. SD1). This limits the possibilities of considering different RCP-SSP scenarios to a single combination: RCP8.5-SSP5. We replicated in our model the GDP and population patterns implied by SSP5, as obtained from the IIASA SSP database (<https://tntcat.iiasa.ac.at/SspDb/dsd?Action=htmlpage&page=10>), considering that the stock of labour follows the same growth pattern shown by the population and that subnational regions follow the projections of the country they belong to. We imposed exogenously the population and labour dynamics in the CGE and calibrated the GDP using the Total Factor Productivity (TFP) to meet the SSP5 targets. Meanwhile, capital accumulation takes place endogenously in the CGE via the recursive addition of investment coming from the previous period.

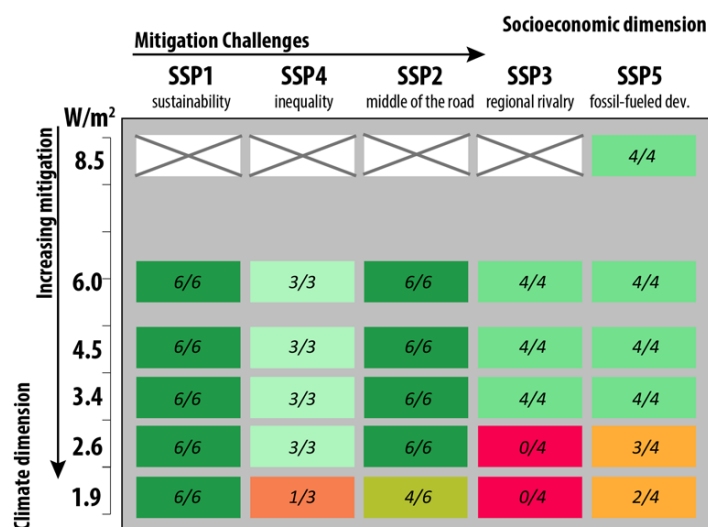

**Figure SD1.** (from Rogelj et al. 2018, Supplementary Information) Overview of available scenario runs in the SSP-RCP matrix framework. Values in each box represent the number of available scenario runs over the number of participating modelling frameworks. Given that used climate data forced by RCP8.5, the only SSP scenario compatible with this data is SSP5.

The results of this additional experiment offer interesting insights. We observe that, in general, economic losses tend to be lower in Europe (Fig. SD2) compared to the previous set of results (Fig. 4a) based on a comparative static framework.

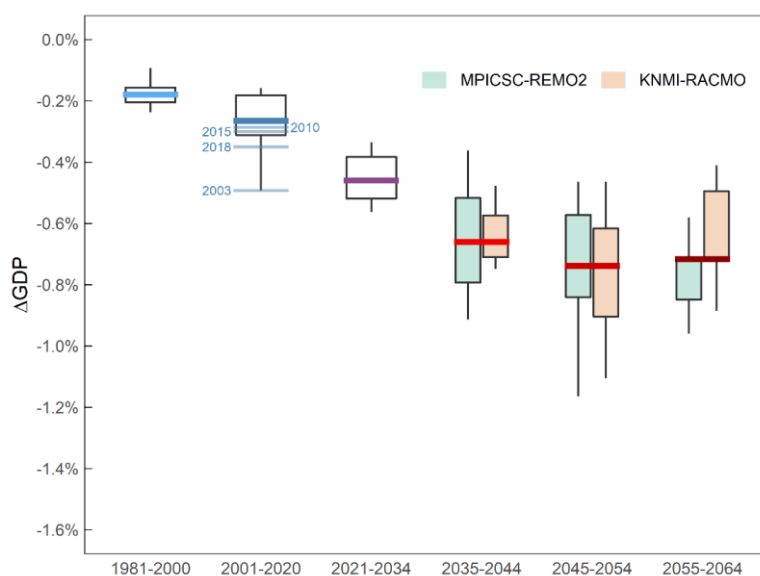

**Figure SD2.** Evolution of economic damages in Europe considering a dynamic framework RCP8.5-SSP5 characterised by a push for economic and social development coupled with the exploitation of abundant fossil fuel resources and absence of climate policies. Boxes cover the interquartile range (IQR, 25th-75th percentiles) of the damage distribution and whiskers show the values contained within  $\pm 1.5 \cdot \text{IQR}$ .



The main driver for this difference is the fact that capital becomes more important in the structure of the future economy. Since the productivity impacts of heatwaves only affect labour, this has a direct consequence on the final allocation of factors. In this setup, the exogenous growth in population (labour) is not sufficient to guarantee a high macroeconomic growth path, as imposed by the SSP5. Hence, capital grows more relative to labour and accumulates in the economy. Thus, the decrease in total damages in response to labour shocks. This higher adaptive capacity shown under the combination RCP8.5-SSP5 can also be observed, for example, in Orlov et al. (2020).

Changes in the demographic composition across regions play a limited role, as population is expected to grow strongly in Northern Europe, grow moderately in Mediterranean Europe and remain stable or even declining in Eastern Europe. Since the hardest impacts of heatwaves are concentrated in Southern Europe, this variable does not influence dramatically the final impact. In contrast, one key driver appears to be the sectoral structure of the economy, especially the weight of outdoor and indoor economic activities projected for the future. While in the comparative-statics experiment, the sectoral composition remains fixed, in the dynamic setup the economy develops according to the GDP and population targets, which are exogenous in the SSP5 but the sectoral composition responds to different market mechanisms, which are all endogenous and confounded in the CGE. These market mechanisms refer to trade specialisation (based on regional comparative advantages), primary factor reallocation across sectors, investment dynamics and to how all these forces interact with the GDP and population targets. This makes the economic structure of some sub-national regions to be changed substantially over time leading to, for example, a retreat of impacts in some southern European economies in the last decade of our analysis (Fig. SD3).

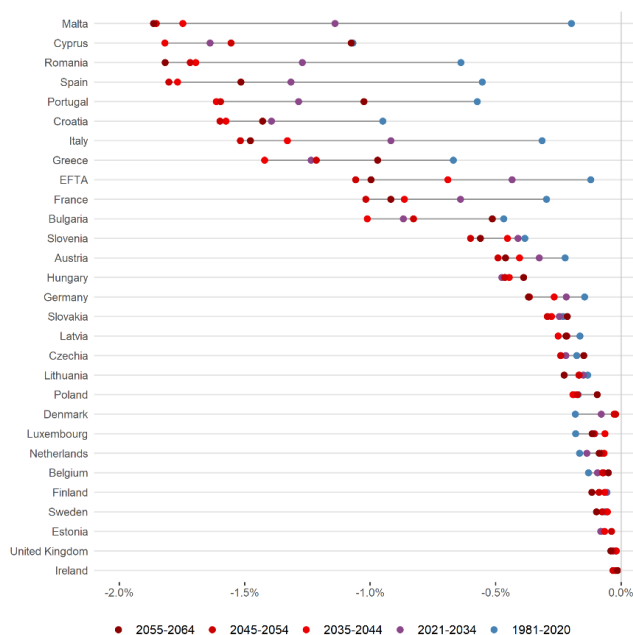

**Figure SD3.** Evolution of heatwave-derived economic damages at the country level under the RCP8.5-SSP5 dynamic scenario.

One way to restrict severe sector reallocations would be to calibrate the sectoral economic composition of the NUTS-2 regions, but this could be computationally infeasible and would also imply a certain degree of arbitrariness, as SSPs do not provide information about the sectoral evolution.

These results point us to existing endogenous mechanisms through which the European economy would partly absorb the projected increasing heat load of work. However, results should be interpreted cautiously, as they are based on a specific future scenario (SSP5) featuring strong economic growth and technological progress as well as rapid and costless adaptation. Some other aspects should also be controlled with more detail as, for example, the evolution of the sectoral economic composition. In addition, because assumptions of demographic and economic developments over long-time spans are highly uncertain (Dellink et al., 2017; Christensen et al., 2018), it would be desirable to perform a comprehensive assessment covering the whole spectrum of RCP-SSP scenarios to account for these uncertainties.

## Supplementary References

Christensen P, Gillingham K, Nordhaus W (2018) Uncertainty in forecasts of long-run economic growth. *Proc. Natl Acad. Sci. USA* 115, 5409–5414.

Dellink R, Chateau J, Lanzi E, Magné, B (2017) Long-term economic growth projections in the shared socioeconomic pathways. *Glob. Environ. Change* 42, 200–214.

Orlov A, Sillman J, Aunan K, Kjellstrom T, Aaheim A (2020) Economic costs of heat-induced reductions in worker productivity due to global warming. *Global Environmental Change* 63:102087.

Rogelj J, Popp A, Calvin KV, et al (2018) Scenarios towards limiting global mean temperature increase below 1.5 °C. *Nature Clim Change* 8, 325–332.
